# Supplementary material
Source: PubMed Central journal article supplement (PMC1440310)
Supplement: 7601040s2.pdf [file 7601040s2.pdf]

## Goodfellow et al – Supplementary Figure

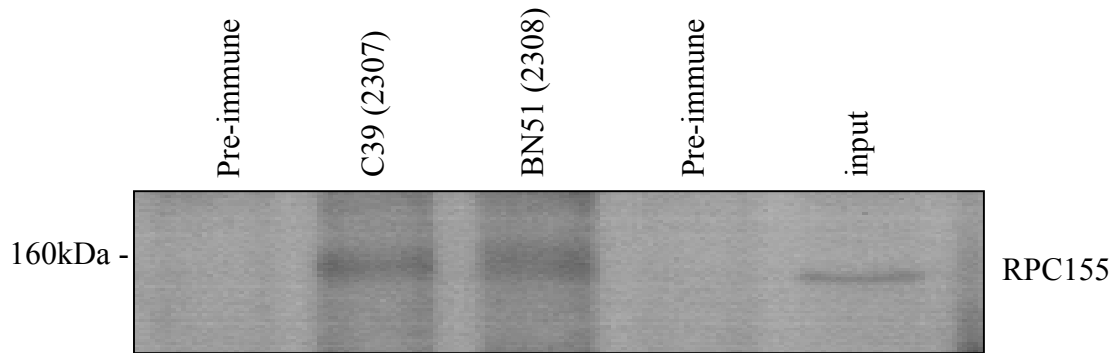

Validation of the antibodies raised against the C39, BN51 and RPC155 subunits of pol III. HeLa nuclear extract was immunoprecipitated using 2307 (raised against C39) or 2308 (raised against BN51) antisera, or pre-immune sera as negative controls. Antisera 2307 and 2308 co-immunoprecipitate a protein of approximately 155kDa, that is recognised by western blotting with antibody 1900, raised against the pol III subunit RPC155. These co-immunoprecipitations demonstrate that the antibodies specifically recognise components of the pol III complex.
